# Supplementary material for: The Stringent Response-Regulated sRNA Transcriptome of Borrelia burgdorferi
Source: Front Cell Infect Microbiol. 2018 Jul 5;8:231. doi: 10.3389/fcimb.2018.00231 (PMC6041397; doi:10.3389/fcimb.2018.00231)
Supplement: Table S2 — List of RelBbu-upregulated sRNAs. [file Table_2.XLSX]

## Sheet: Sheet1
#id	Genetic Element	Start	Stop	Strand	Type	Associated ORF	Category	Fold change	edgeR.adjpvalues
SR0700	chr	870007	870078	-	5'UTR	bb0826 (TPR protein)	U	20.5533	3.90707e-11
SR0812	lp28-4	19115	19208	-	5'UTR	bbI29 (virulent strain associated lipoprotein)	CE	8.59989	1.4841e-13
SR0033	chr	49223	49325	-	5'UTR	bb0052 (spoU; RNA methyltransferase)	TL	8.23622	3.54336e-13
SR0672	chr	831633	831684	+	5'UTR	bb0794 (tamB; OMP secretion)	TL	7.94944	4.20933e-17
SR0743	lp21	1488	1585	+	5'UTR	bbU04 (PF62 protein)	CD	6.2389	2.33048e-13
SR0399	chr	531636	531705	-	5'UTR	bb0519 (grpE; cochaperone)	SR	5.83617	6.50431e-06
SR0291	chr	410714	410811	+	5'UTR	bb0399	U	5.72323	3.7139e-05
SR0926	lp56	37477	37591	-	5'UTR	bbQ55	ψ	5.11011	6.54831e-08
SR0354	chr	477997	478113	-	5'UTR	bb0457 (uvrC; exinuclease ABC, subunit C)	RR	4.82257	4.33133e-08
SR0641	chr	789321	789372	+	5'UTR	bb0745 (nth; endonuclease III)	RR	4.75011	3.45848e-10
SR0144	chr	193707	193830	+	5'UTR	bb0196 (prfA; peptide chain release factor)	TL	4.7309	1.97944e-08
SR0804	lp28-4	10785	10863	+	5'UTR	bbI19 (PF62 protein)	CD	4.65493	4.06512e-09
SR0546	chr	686437	686563	-	5'UTR	bb0647(bosR; Fur/PerR transcriptional regulator)	TR	4.29246	6.32175e-08
SR0789	lp28-3	10436	10535	-	5'UTR	bbh13 (bdr)	CE	4.06345	4.18036e-07
SR0832	lp36	16149	16292	+	5'UTR	bbk24	CD	4.02442	5.41521e-09
SR0226	chr	320204	320288	-	5'UTR	bb0313 (rrmJ; 23S rRNA methyltransferase)	TL	3.63143	2.39709e-05
SR0270	chr	384156	384209	-	5'UTR	bb0373	U	3.55663	0.000688438
SR0497	chr	645584	645634	-	5'UTR	bb0618 (cdd; cytidine deaminase)	TR	3.53569	9.08757e-06
SR0659	chr	814592	814728	-	5'UTR	bb0772 (flgI; flagellar P-ring protein)	CM	3.3523	4.08021e-08
SR0350	chr	474517	474568	-	5'UTR	bb0454 (mgs; monogalactosyl-1,2-diacylglycerol synthase)	MT	3.2719	0.000203874
SR0888	lp54	11715	11850	+	5'UTR	bbA18	TP	3.17205	5.64644e-08
SR0001	chr	3151	3344	-	5'UTR	bb0003	ψ	3.1474	2.6791e-06
SR0388	chr	513075	513178	-	5'UTR	bb0507 (ribosomal-protein-alanine acetyltransferase)	TL	3.05817	1.26201e-06
SR0292	chr	413076	413127	+	5'UTR	bb0401 (glutamate transporter)	TP	3.05046	1.55733e-06
SR0232	chr	327661	327820	-	5'UTR	bb0322	U	3.00896	5.93629e-08
SR0556	chr	695610	695677	+	5'UTR	bb0656 (hemN; oxygen-independent coproporphyrinogen III oxidase)	MT	2.87275	4.07539e-05
SR0048	chr	70112	70209	+	5'UTR	bb0074 (prfB; peptide chain release factor)	TL	2.73949	1.38333e-05
SR0515	chr	658876	658926	+	5'UTR	bb0628	CE	2.73788	5.23819e-06
SR0180	chr	231582	231653	+	5'UTR	bb0227	CE	2.72017	5.56478e-05
SR0752	lp25	13269	13418	-	5'UTR	bbE20 (PF50 protein)	CD	2.65471	0.00161688
SR0070	chr	114758	114831	+	5'UTR	bb0117 (yplQ; hemolysin III)	CE	2.568	0.0135096
SR0714	chr	888242	888378	+	5'UTR	bb0836 (uvrB; exinuclease ABC, subunit B)	RR	2.54216	7.55956e-05
SR0771	lp28-2	4254	4360	+	5'UTR	bbG06	ψ	2.5384	9.01178e-05
SR0439	chr	590184	590243	-	5'UTR	bb0576	U	2.46136	0.0463918
SR0389	chr	513193	513274	+	5'UTR	bb0508 (engA; GTPase Der)	TL	2.33565	0.000434047
SR0595	chr	735317	735453	+	5'UTR	bb0694 (ffh; SRP protein)	TL	2.2947	1.25613e-05
SR0251	chr	355027	355372	-	5'UTR	bb0346 (lolA; periplasmic lipoprotein-binding chaperone)	TL	2.2755	1.09878e-05
SR0585	chr	724200	724250	+	5'UTR	bb0683 (hmgs; HMG-CoA synthase)	MT	2.27438	0.00795684
SR0002	chr	3324	3455	+	5'UTR	bb0004 (femD; phosphoglucomutase)	MT	2.26468	0.00119242
SR0544	chr	682376	682525	-	5'UTR	bb0643 (ylqF; ribosome biogenesis GTPase)	TL	2.23086	0.000414101
SR0021	chr	39498	39675	-	5'UTR	bb0039	U	2.2162	2.37964e-05
SR0671	chr	830827	830944	-	5'UTR	bb0792	U	2.21437	0.000833043
SR0177	chr	229214	229309	+	5'UTR	bb0225 (hisA; phosphoribosylformimino-5-aminoimidazole carboxamide ribotide isomerase)	MT	2.17222	0.000648773
SR0419	chr	565644	565717	-	5'UTR	bb0553	CE	2.10621	0.000594878
SR0124	chr	175079	175129	+	AS	bb0173 (vWFA domain-containing protein)	CE	10.413	0.000355504
SR0722	chr	903124	903225	-	AS	bb0843 (arcD; arginine transporter)	TP	10.3631	3.85012e-11
SR0063	chr	104400	104492	+	AS	bb0106 (TPR protein)	U	9.37777	0.000103257
SR0805	lp28-4	12723	12841	-	AS	bbI21 (PF32 protein)	CD	7.25513	5.55548e-14
SR0751	lp25	12423	12474	+	AS	bbE10	U	7.07307	0.000307038
SR0008	chr	8549	8626	-	AS	bb0008 (cdaA; cyclic di-AMP synthase)	ST	6.51361	5.77235e-08
SR0315	chr	434558	434623	+	AS	bb0420 (hk1; histidine kinase)	ST	6.46843	1.72935e-09
SR0438	chr	589932	589983	+	AS	bb0576	U	6.36013	3.91321e-08
SR0665	chr	822408	822455	-	AS	bb0784 (rsfS; ribosome silencing factor)	TL	6.14719	1.94677e-06
SR0684	chr	842145	842197	-	AS	bb0798 (comF; competence protein F)	RR	6.00629	0.00122379
SR0453	chr	603273	603344	-	AS	bb0585 (murD; UDP-N-acetylmuramoylalanine-D-glutamate ligase)	CE	5.72845	1.40766e-06
SR0553	chr	693535	693614	-	AS	bb0654	U	5.72115	1.94343e-08
SR0083	chr	128171	128251	+	AS	bb0132 (greA; transcription elongation factor)	TR	5.67018	0.000107125
SR0563	chr	704005	704054	-	AS	bb0666 (cwlD; N-acetylmuramyl-L-alanine amidase)	CD	5.48895	1.79469e-05
SR0693	chr	860333	860545	-	AS	bb0814 (panF; sodium/panthothenate symporter)	TP	5.16697	0.00195351
SR0763	lp25	23946	23996	+	AS	bbE33	ψ	4.65836	0.000676007
SR0413	chr	552972	553063	-	AS	bb0542 (TPR protein)	CE	4.58376	2.29578e-06
SR0607	chr	745826	745920	-	AS	bb0709 (yceG)	U	4.51589	8.37052e-07
SR0922	lp56	19795	19848	-	AS	bbQ33	U	4.50591	2.82198e-05
SR0697	chr	863477	863550	-	AS	bb0816 (dephospho-CoA kinase)	MT	4.38635	0.000516943
SR0429	chr	577156	577206	+	AS	bb0564	U	4.34558	6.66917e-05
SR0293	chr	413744	413791	-	AS	bb0401 (glutamate transporter)	TP	4.09705	0.000156736
SR0007	chr	7600	7662	+	AS	bb0007 (serB; phosphoserine phosphatase)	MT	4.09421	1.72935e-09
SR0228	chr	322977	323053	+	AS	bb0317 (ecfT; riboflavin ABC transporter, permease)	TP	3.99848	0.00403937
SR0053	chr	80423	80540	-	AS	bb0084 (sufS; cysteine disulfurase)	MT	3.99733	1.08936e-10
SR0803	lp28-4	6472	6627	-	AS	bbI15 (lipoprotein)	CE	3.78603	5.61303e-06
SR0072	chr	115524	115594	+	AS	bb0118 (rseP; metalloprotease)	PD	3.78559	0.00035557
SR0442	chr	593038	593116	-	AS	bb0579 (dnaE; DNA polymerase III, subunit alpha)	RR	3.76814	1.44127e-05
SR0739	lp17	15175	15225	-	AS	bbD23 (transposase-like)	ψ	3.75195	0.000724953
SR0198	chr	261078	261150	-	AS	bb0252 (antibiotic efflux)	TP	3.63774	2.07919e-10
SR0768	lp28-1	13306	13356	+	AS	bbF24 (PF32 protein)	CD	3.55275	1.373e-05
SR0817	lp36	3097	3167	+	AS	bbk02a	ψ	3.46225	5.54046e-06
SR0107	chr	161458	161510	+	AS	bb0161	U	3.38992	0.00365702
SR0164	chr	210844	210893	-	AS	bb0208	U	3.37517	0.0230507
SR0819	lp36	6782	6861	+	AS	bbk10	ψ	3.35735	0.00098855
SR0086	chr	131278	131328	-	AS	bb0134	U	3.33315	0.000602013
SR0621	chr	761058	761178	-	AS	bb0722	U	3.26399	0.000530345
SR0390	chr	514927	514977	-	AS	bb0509	U	3.25824	6.36478e-05
SR0074	chr	117446	117497	+	AS	bb0119 (cdsA; phosphatidate cytidylyltransferase)	ψ	3.2436	0.010094
SR0039	chr	61365	61529	+	AS	bb0067 (peptidase)	PD	3.18365	8.65529e-06
SR0476	chr	623903	623953	-	AS	bb0600 (ybeY; rRNA maturation RNase)	TL	3.14955	0.0426329
SR0250	chr	350380	350450	+	AS	bb0342 (gatA; tRNA amidotransferase, subunit A)	TL	3.13706	5.68785e-05
SR0433	chr	585174	585254	-	AS	bb0572 (lgtD; glycosyltransferase)	CE	3.13438	2.67427e-05
SR0027	chr	45022	45128	+	AS	bb0045 (P115 protein)	U	3.12683	9.70231e-06
SR0238	chr	331922	332040	+	AS	bb0326 (TPR protein)	CE	3.0945	9.7088e-05
SR0710	chr	883224	883286	+	AS	bb0833 (ileS; isoleucyl-tRNA synthetase)	TL	3.06634	0.00129942
SR0825	lp36	12718	12804	-	AS	bbk19 (lipoprotein)	CE	3.03067	2.93729e-05
SR0688	chr	856162	856327	-	AS	bb0810 (murJ; peptidylglycan flipase)	CE	3.0198	1.51556e-08
SR0431	chr	581843	581934	-	AS	bb0569 (tlpC; chemotaxis protein)	CM	3.01401	0.00349505
SR0737	lp17	12541	12595	-	AS	bbD20 (transposase-like)	ψ	2.9583	8.00825e-06
SR0005	chr	5053	5194	-	AS	bb0004 (glmM; phosphoglucomutase)	MT	2.90471	8.55773e-09
SR0687	chr	848259	848344	-	AS	bb0803 (truB; pseudouridine synthase)	TL	2.87847	0.000161422
SR0148	chr	198383	198577	-	AS	bb0199	U	2.87038	4.02226e-06
SR0099	chr	155117	155164	+	AS	bb0154 (secA; protein translocase)	TL	2.84143	0.000950783
SR0132	chr	181625	181674	+	AS	bb0179 (trmE; tRNA modification GTPase)	TL	2.82783	0.00275524
SR0081	chr	125198	125274	+	AS	bb0129 (rlu; pseudouridine synthase)	TL	2.82475	6.47036e-06
SR0522	chr	664859	664909	+	AS	bb0632 (recD; exonuclease V, subunit alpha)	RR	2.8221	0.000432692
SR0466	chr	615492	615542	+	AS	bb0594 (argS; arginyl-tRNA synthetase)	TL	2.77294	1.09302e-06
SR0630	chr	769844	769939	+	AS	bb0730 (pgi; glucose-6-phosphate isomerase	MT	2.77087	0.000118636
SR0216	chr	297224	297343	+	AS	bb0287 (fliJ; flagellar export protein)	CM	2.75214	0.013624
SR0616	chr	754389	754504	-	AS	bb0717 (mreD; rod shape-determining protein)	CD	2.75155	0.00115821
SR0855	lp38	11938	12048	+	AS	bbJ18 (PF32 protein)	CD	2.66759	0.00159133
SR0171	chr	221936	222148	-	AS	bb0217(pstA; phosphate ABC transporter, permease)	TP	2.6372	8.09251e-07
SR0730	lp17	8407	8488	-	AS	bbD14	U	2.61089	0.000830942
SR0839	lp36	25584	25676	-	AS	bbk40	TP	2.57689	7.95192e-05
SR0167	chr	216448	216607	-	AS	bb0211 (mutL; DNA mismatch repair protein)	RR	2.54309	1.05739e-06
SR0126	chr	176642	176692	+	AS	bb0174	U	2.50015	0.0405377
SR0207	chr	276164	276261	+	AS	bb0262	CD	2.48512	0.000785105
SR0445	chr	596343	596441	-	AS	bb0580	CE	2.47897	0.00174842
SR0096	chr	153045	153131	+	AS	bb0153 (sodA; superoxide dismutase)	SR	2.47463	0.000709011
SR0303	chr	421685	421770	-	AS	bb0409	U	2.46195	0.00234657
SR0196	chr	260581	260797	-	AS	bb0252 (antibiotic efflux)	TP	2.42065	3.74373e-05
SR0015	chr	27083	27133	-	AS	bb0028	U	2.41329	0.000344663
SR0192	chr	254551	254702	-	AS	bb0248 (pepF; oligoendopeptidase F)	PD	2.39749	0.000332111
SR0573	chr	714672	714721	+	AS	bb0676 (gph; phosphoglycolate phosphatase)	MT	2.39467	0.00899094
SR0366	chr	486834	486998	-	AS	bb0466 (lptB; ABC transporter, ATP-binding subunit)	TP	2.36783	0.000686846
SR0295	chr	414168	414265	-	AS	bb0401 (glutamate transporter)	TP	2.3106	0.000308866
SR0493	chr	640167	640373	-	AS	bb0613 (lon-2; ATP-dependent protease LA)	PD	2.26443	0.0002374
SR0485	chr	634371	634507	-	AS	bb0607 (pcrA; ATP-dependent DNA helicase)	RR	2.25788	0.00113399
SR0076	chr	120029	120166	+	AS	bb0123 (rpsB; ribosomal protein S2)	TL	2.25551	0.00371675
SR1001	cp32-8	22556	22606	-	AS	bbl35 (bdrO)	CE	2.25392	0.010094
SR0322	chr	442772	442839	+	AS	bb0422 (mag; DNA-3-methyladenine glycosylase)	RR	2.24348	0.00191131
SR0045	chr	67706	67811	-	AS	bb0072	U	2.23232	0.0130515
SR0184	chr	233547	233670	-	AS	bb0228	PD	2.20989	0.003995
SR0279	chr	399917	400037	+	AS	bb0388 (rpoC; DNA-directed RNA polymerase, beta' subunit)	TR	2.19396	0.00667807
SR0525	chr	666439	666490	+	AS	bb0633 (recB; exodeoxyribonuclease V, beta subunit)	RR	2.19255	0.00656417
SR0681	chr	839800	839940	-	AS	bb0797 (mutS; DNA mismatch repair protein)	RR	2.16093	0.00103451
SR0092	chr	141357	141458	+	AS	bb0140 (besB, acrB)	ψ	2.14764	0.000488768
SR0400	chr	532157	532283	-	AS	bb0522 (nadE)	ψ	2.13369	0.0038906
SR0203	chr	269511	269627	+	AS	bb0257 (ftsK, DNA translocase)	CD	2.12425	0.0448372
SR0920	lp56	1727	1774	-	AS	bbQ04	ψ	2.11539	0.0246998
SR0155	chr	204592	204664	-	AS	bb0203 (hflK; modulator of FtsH protease)	PD	2.11151	0.000772568
SR0183	chr	232863	232953	-	AS	bb0228 (pqqF; coenzyme PQQ biosynthesis protein)	PD	2.10835	0.00383806
SR0046	chr	68117	68242	-	AS	bb0072	U	2.09195	0.00530443
SR0139	chr	191060	191138	-	AS	bb0193 (lipoprotein)	CE	2.08569	0.00314331
SR0652	chr	803502	803605	-	AS	bb0761	U	2.05553	0.00938516
SR0457	chr	605915	605980	+	AS	bb0587 (metG; methionyl-tRNA synthetase)	TL	2.01692	0.00177108
SR0042	chr	62874	62966	+	AS	bb0067 (peptidase)	PD	2.01284	0.0101696
SR0022	chr	39746	39825	+	IG			37.3748	1.0742e-23
SR0734	lp17	10785	10833	+	IG			18.6221	1.18746e-29
SR0760	lp25	21790	21835	+	IG			12.8952	3.79262e-12
SR0242	chr	334785	334836	+	IG			10.3833	3.1174e-15
SR0810	lp28-4	16622	16679	+	IG			7.91847	0.00242165
SR0912	lp54	46072	46182	-	IG			7.8169	1.0954e-20
SR0802	lp28-4	4991	5057	+	IG			7.2535	1.38043e-07
SR1002	cp32-8	23033	23092	+	IG			7.13944	6.19927e-17
SR0798	lp28-4	1403	1453	-	IG			6.70401	4.20933e-17
SR0878	lp38	37312	37366	+	IG			5.84761	5.73579e-19
SR0726	lp17	4269	4366	-	IG			5.56097	1.39078e-08
SR0801	lp28-4	4780	4878	-	IG			5.45059	1.72956e-11
SR0756	lp25	18781	18831	-	IG			5.41184	0.00847819
SR0866	lp38	26536	26601	-	IG			5.26466	3.4362e-07
SR0143	chr	193545	193598	-	IG			5.13123	5.74465e-12
SR0990	cp32-6	18834	18885	-	IG			4.20692	2.72167e-13
SR0363	chr	485379	485427	-	IG			3.90396	0.00746404
SR0692	chr	860131	860279	+	IG			3.84914	4.87087e-09
SR0996	cp32-7	18868	18935	-	IG			3.79591	7.22632e-12
SR0811	lp28-4	18054	18138	+	IG			3.71498	1.81405e-07
SR0961	cp26	10732	10792	+	IG			3.67526	1.05079e-09
SR0011	chr	15804	15874	+	IG			3.52571	1.73566e-05
SR0296	chr	416521	416590	-	IG			3.48515	0.00861437
SR0757	lp25	19502	19590	+	IG			3.39696	0.0433318
SR0742	lp21	1290	1341	-	IG			3.35077	8.66306e-10
SR0796	lp28-3	25268	25328	-	IG			3.32955	0.0334568
SR0095	chr	150850	150899	+	IG			3.26885	0.0218958
SR0834	lp36	18792	18872	-	IG			3.214	0.0042292
SR0808	lp28-4	14738	14812	+	IG			3.08615	0.000397563
SR0918	lp54	51191	51240	-	IG			3.02125	1.12345e-05
SR1004	cp32-9	18914	18981	-	IG			2.91862	1.07256e-07
SR0319	chr	438345	438394	-	IG			2.83493	0.000155821
SR0925	lp56	31737	31811	-	IG			2.82197	0.0144438
SR0200	chr	263804	263907	+	IG			2.79389	4.67523e-05
SR0244	chr	336511	336566	+	IG			2.60108	0.000263822
SR0736	lp17	11749	11834	+	IG			2.54505	0.00128895
SR0755	lp25	15951	16077	+	IG			2.51034	1.87424e-05
SR0725	lp17	2883	2934	-	IG			2.44363	2.9763e-07
SR0754	lp25	15673	15945	-	IG			2.35336	0.000373921
SR0862	lp38	24736	24811	+	IG			2.29495	0.00105935
SR0982	cp32-3	19353	19422	-	IG			2.07038	8.99056e-05
SR0316	chr	435208	435432	-	ncRNA	5S rRNA	TL	2.22186	5.10839e-05
SR0320	chr	438439	438556	-	ncRNA	5S rRNA	TL	2.08993	0.000567691
SR0136	chr	188520	188702	-	ncRNA	6S RNA	TR	3.31543	8.5493e-09
SR0440	chr	590903	590953	+	ncRNA	DsrA	TL	2.56168	5.74087e-05
